# Supplementary material for: Safety, Efficacy, and Biomarker Analyses of Dostarlimab in Patients with Endometrial Cancer: Interim Results of the Phase I GARNET Study
Source: PubMed Central journal article supplement — Clin Cancer Res. 2023 Jun 26;29(22):4564–74. doi: 10.1158/1078-0432.CCR-22-3915 (PMC10643997; doi:10.1158/1078-0432.ccr-22-3915), 2023-06-26
Supplement: ccr-22-3915_supplementary_appendix_1_suppas1.pdf [file ccr-22-3915_supplementary_appendix_1_suppas1.pdf]

## Supplemental Appendix

Supplement to: Oaknin A, Pothuri B, Gilbert L, et al. Safety, Efficacy, and Biomarker Analyses of Dostarlimab in Patients with Endometrial Cancer: Interim Results of the Phase I GARNET Study

### Contents

|                                                                                                                                                |    |
|------------------------------------------------------------------------------------------------------------------------------------------------|----|
| Supplementary Table S1. Representativeness of study participants .....                                                                         | 2  |
| Supplementary Table S2. Demographics and baseline characteristics .....                                                                        | 3  |
| Supplementary Table S3. Objective response rate in patients who had received prior treatment only in the adjuvant or neoadjuvant setting. .... | 4  |
| Supplementary Table S4. Safety.....                                                                                                            | 5  |
| Supplementary Figure S1. Enrollment and outcomes.....                                                                                          | 6  |
| Supplementary Figure S2. Best percent volume change in target lesions based on BICR per RECIST 1.1.....                                        | 7  |
| Supplementary Figure S3. Progression-free survival by cohort.....                                                                              | 9  |
| Supplementary Figure S4. Overall survival by cohort.....                                                                                       | 11 |
| Supplementary Figure S5. Objective response rate by tumor histology.....                                                                       | 13 |
| Supplementary Figure S6. DOR and PFS by molecular subtype.....                                                                                 | 15 |

**Supplementary Table S1.** Representativeness of study participants.

|                                              |                                                                                                                                                                                                                                                                                                                                               |
|----------------------------------------------|-----------------------------------------------------------------------------------------------------------------------------------------------------------------------------------------------------------------------------------------------------------------------------------------------------------------------------------------------|
| Cancer type(s)/subtype(s)/stage(s)/condition | Advanced or recurrent endometrial cancer                                                                                                                                                                                                                                                                                                      |
| Considerations related to:                   |                                                                                                                                                                                                                                                                                                                                               |
| Sex                                          | Endometrial cancer is a cancer that affects women                                                                                                                                                                                                                                                                                             |
| Age                                          | The prevalence of endometrial cancer increases with age                                                                                                                                                                                                                                                                                       |
| Race/ethnicity                               | The risk of death from endometrial cancer is higher for black women in the United States than for white women                                                                                                                                                                                                                                 |
| Geography                                    | Incidence rates and mortality rates of endometrial cancer are higher in North America and Europe than in other geographical areas                                                                                                                                                                                                             |
| Other considerations                         | Between 25 and 30% of all patients with endometrial cancer have dMMR/MSI-H tumors                                                                                                                                                                                                                                                             |
| Overall representativeness of this study     | The participants in this trial were recruited from mainly North American and European sites. This reflects the higher incidence rates seen in these areas. In addition, this trial includes not only patients with MMRp/MSS tumors, but patients with dMMR/MSI-H tumors, which are found in at least 25% of patients with endometrial cancer. |

**Supplementary Table S2.** Demographics and baseline characteristics.

| <b>Characteristic</b>                                     | <b>dMMR/MSI-H<br/>EC<br/>N = 143</b> | <b>MMRp/MSS<br/>EC<br/>N = 156</b> |
|-----------------------------------------------------------|--------------------------------------|------------------------------------|
| Age, median (range), y                                    | 65.0 (39–85)                         | 66.0 (30–86)                       |
| ECOG performance status, n (%)                            |                                      |                                    |
| 0                                                         | 56 (39.2)                            | 83 (53.2)                          |
| 1                                                         | 87 (60.8)                            | 73 (46.8)                          |
| FIGO disease stage at diagnosis, n (%) <sup>a</sup>       |                                      |                                    |
| Stage I or II                                             | 62 (43.4)                            | 57 (36.5)                          |
| Stage III or IV                                           | 81 (56.6)                            | 98 (62.8)                          |
| Histology, n (%)                                          |                                      |                                    |
| Grade 1 or 2 endometrioid carcinoma                       | 92 (64.3)                            | 36 (23.1)                          |
| Serous                                                    | 7 (4.9)                              | 63 (40.4)                          |
| Grade 3 endometrioid                                      | 21 (14.7)                            | 14 (9.0)                           |
| Clear cell                                                | 1 (0.7)                              | 11 (7.1)                           |
| Squamous                                                  | 1 (0.7)                              | 3 (1.9)                            |
| Undifferentiated                                          | 4 (2.8)                              | 3 (1.9)                            |
| Carcinosarcoma                                            | 0                                    | 2 (1.3)                            |
| Mixed carcinoma                                           | 7 (4.9)                              | 11 (7.1)                           |
| Unspecified                                               | 4 (2.8)                              | 9 (5.8)                            |
| Other <sup>b</sup>                                        | 4 (2.8)                              | 4 (2.6)                            |
| Unknown                                                   | 2 (1.4)                              | 0                                  |
| Prior platinum-doublet therapy, n (%)                     | 139 (97.2)                           | 155 (99.4)                         |
| Prior lines of therapy, n (%) <sup>c</sup>                |                                      |                                    |
| 1                                                         | 90 (62.9)                            | 72 (46.2)                          |
| 2                                                         | 35 (24.5)                            | 67 (42.9)                          |
| ≥3                                                        | 18 (12.6)                            | 17 (10.9)                          |
| Patients with only adjuvant or neoadjuvant therapy, n (%) | 49 (34.3)                            | 42 (26.9)                          |
| Prior radiation, n (%)                                    | 101 (70.6)                           | 95 (60.9)                          |

<sup>a</sup>One patient with MMRp EC had disease status/stage unknown.

<sup>b</sup>Other includes dedifferentiated, endometrial adenocarcinoma, endometrial adenocarcinoma not otherwise specified, endometrial neuroendocrine carcinoma, high grade uterine carcinoma, and undifferentiated clear cell carcinoma.

<sup>c</sup>Includes lines of therapy in the adjuvant setting.

dMMR, mismatch repair deficient; EC, endometrial cancer; FIGO, International Federation of Gynecology and Obstetrics; MMRp, mismatch repair proficient; MSI-H, microsatellite instability–high; MSS, microsatellite stable.

**Supplementary Table S3.** Objective response rate in patients who had received prior treatment only in the adjuvant or neoadjuvant setting.

| <b>dMMR/MSI-H EC Patients</b>  |                          |                                |
|--------------------------------|--------------------------|--------------------------------|
|                                | <b>dMMR<br/>(N = 48)</b> | <b>dMMR/MSI-H<br/>(N = 49)</b> |
| ORR, n, % (95% CI)             | 20, 41.7% (27.6–56.8)    | 21, 42.9% (28.8–57.8)          |
| Best confirmed response, n (%) |                          |                                |
| CR                             | 7 (14.6)                 | 8 (16.3)                       |
| PR                             | 13 (27.1)                | 13 (26.5)                      |
| SD                             | 9 (18.8)                 | 9 (18.4)                       |
| PD                             | 15 (31.3)                | 15 (30.6)                      |
| NE                             | 4 (8.4)                  | 4 (8.1)                        |
| DCR, n (%)                     | 29 (60.4)                | 30 (61.2)                      |
| <b>MMRp/MSS EC Patients</b>    |                          |                                |
|                                | <b>MMRp<br/>(N = 38)</b> | <b>MMRp/MSS<br/>(N = 42)</b>   |
| ORR, n, % (95% CI)             | 9, 23.7% (11.4–40.2)     | 10, 23.8% (12.1–39.5)          |
| Best confirmed response, n (%) |                          |                                |
| CR                             | 4 (10.5)                 | 4 (9.5)                        |
| PR                             | 5 (13.2)                 | 6 (14.3)                       |
| SD                             | 6 (15.8)                 | 6 (14.3)                       |
| PD                             | 20 (52.6)                | 23 (54.8)                      |
| NE                             | 3 (7.9)                  | 3 (7.1)                        |
| DCR, n (%)                     | 15 (39.5)                | 16 (38.1)                      |

CR, complete response; DCR, disease control rate; dMMR, mismatch repair deficient; DOR, duration of response; MMRp, mismatch repair proficient; MMRunk, mismatch repair unknown; MSI-H, microsatellite instability–high; MSS, microsatellite stable; NE, not evaluable, includes patients with a best response of not done; PD, progressive disease; PR, partial response; SD, stable disease.

**Supplementary Table S4. Safety.**

| Parameter, n (%)                                                    | dMMR/MSI-H EC<br>(N = 153) | MMRp/MSS EC<br>(N = 161) | Overall<br>(N = 314) |
|---------------------------------------------------------------------|----------------------------|--------------------------|----------------------|
| <b>Safety summary</b>                                               |                            |                          |                      |
| Any TEAE                                                            | 152 (99.3)                 | 161 (100)                | 313 (99.7)           |
| Grade ≥3 TEAE                                                       | 87 (56.9)                  | 95 (59.0)                | 182 (58.0)           |
| Any-grade TRAE                                                      | 108 (70.6)                 | 115 (71.4)               | 223 (71.0)           |
| Grade ≥3 TRAE                                                       | 27 (17.6)                  | 33 (20.5)                | 60 (19.1)            |
| Any irTRAE                                                          | 42 (27.5)                  | 31 (19.3)                | 73 (23.2)            |
| Grade ≥3 irTRAE                                                     | 16 (10.5)                  | 9 (5.6)                  | 25 (8.0)             |
| Treatment-related SAE                                               | 18 (11.8)                  | 14 (8.7)                 | 32 (10.2)            |
| Any TRAE leading to discontinuation                                 | 13 (8.5)                   | 14 (8.7)                 | 27 (8.6)             |
| TRAE leading to death                                               | 0                          | 0                        | 0                    |
| <b>Any grade TRAEs in &gt;10% of patients</b>                       |                            |                          |                      |
| Fatigue                                                             | 21 (13.7)                  | 35 (21.7)                | 56 (17.8)            |
| Diarrhea                                                            | 25 (16.3)                  | 21 (13.0)                | 46 (14.6)            |
| Nausea                                                              | 19 (12.4)                  | 24 (14.9)                | 43 (13.7)            |
| Asthenia                                                            | 24 (15.7)                  | 13 (8.1)                 | 37 (11.8)            |
| <b>Grade ≥3 TRAEs that occurred in &gt;2 (0.5%) patients</b>        |                            |                          |                      |
| Anemia                                                              | 7 (4.6)                    | 3 (1.9)                  | 10 (3.2)             |
| ALT increased                                                       | 3 (2.0)                    | 3 (1.9)                  | 6 (1.9)              |
| Diarrhea                                                            | 3 (2.0)                    | 2 (1.2)                  | 5 (1.6)              |
| Amylase increased                                                   | 1 (0.7)                    | 4 (2.5)                  | 5 (1.6)              |
| Fatigue                                                             | 1 (0.7)                    | 3 (1.9)                  | 4 (1.3)              |
| AST increased                                                       | 0                          | 4 (2.5)                  | 4 (1.3)              |
| Hyperglycemia                                                       | 1 (0.7)                    | 3 (1.9)                  | 4 (1.3)              |
| Lipase increased                                                    | 3 (2.0)                    | 1 (0.6)                  | 4 (1.3)              |
| Pneumonitis                                                         | 2 (1.3)                    | 1 (0.6)                  | 3 (1.0)              |
| <b>Grade ≥2 irTRAEs occurring in ≥2% of patients</b>                |                            |                          |                      |
| Hypothyroidism                                                      | 13 (8.5)                   | 13 (8.1)                 | 26 (8.3)             |
| ALT increased                                                       | 5 (3.3)                    | 3 (1.9)                  | 8 (2.5)              |
| AST increased                                                       | 2 (1.3)                    | 5 (3.1)                  | 7 (2.2)              |
| Arthralgia                                                          | 6 (3.9)                    | 4 (2.5)                  | 10 (3.2)             |
| <b>Grade ≥3 irTRAEs occurring in ≥1% of patients</b>                |                            |                          |                      |
| ALT increased                                                       | 3 (2.0)                    | 3 (1.9)                  | 6 (1.9)              |
| AST increased                                                       | 0                          | 4 (2.5)                  | 4 (1.3)              |
| Pneumonitis                                                         | 2 (1.3)                    | 1 (0.6)                  | 3 (1.0)              |
| <b>Any grade TRAE leading to discontinuation in ≥1% of patients</b> |                            |                          |                      |
| ALT increased                                                       | 2 (1.3)                    | 3 (1.9)                  | 5 (1.6)              |
| AST increased                                                       | 1 (0.7)                    | 2 (1.2)                  | 3 (1.0)              |
| Pneumonitis                                                         | 2 (1.3)                    | 1 (0.6)                  | 3 (1.0)              |

ALT, alanine transaminase, AST; aspartate transferase; dMMR, mismatch repair deficient; EC, endometrial cancer; irTRAE, immune-related TRAE; MMR, mismatch repair; MMRp, mismatch repair-proficient; MSI-H, microsatellite instability-high; MSS, microsatellite stable; SAE, serious adverse event; TEAE, treatment-emergent adverse event; TRAE, treatment-related adverse event.

### Supplementary Figure S1. Enrollment and outcomes.

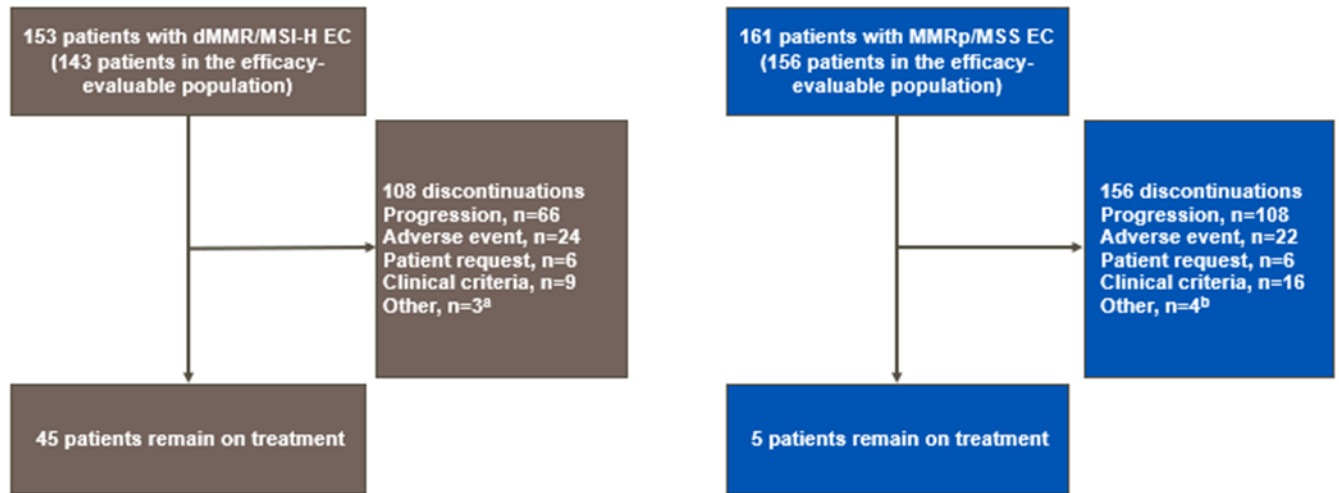

Data cutoff date: November 1, 2021. Ten (cohort A1) and 5 (cohort A2) patients were excluded from the efficacy-evaluable population because they had no measurable disease at baseline, per BICR.

<sup>a</sup>Three patients in cohort A1 died of disease progression.

<sup>b</sup>Two patients in cohort A2 died of disease progression, 1 patient was sent to hospice care, and 1 patient discontinued because of a joint decision between patient and investigator.

BICR, blinded independent central review; dMMR, mismatch repair-deficient; EC, endometrial cancer; MMRp, mismatch repair-proficient; MSI-H, microsatellite instability-high; MSS, microsatellite stable.

**Supplementary Figure S2.** Best percent volume change in target lesions based on BICR per RECIST 1.1.

A.

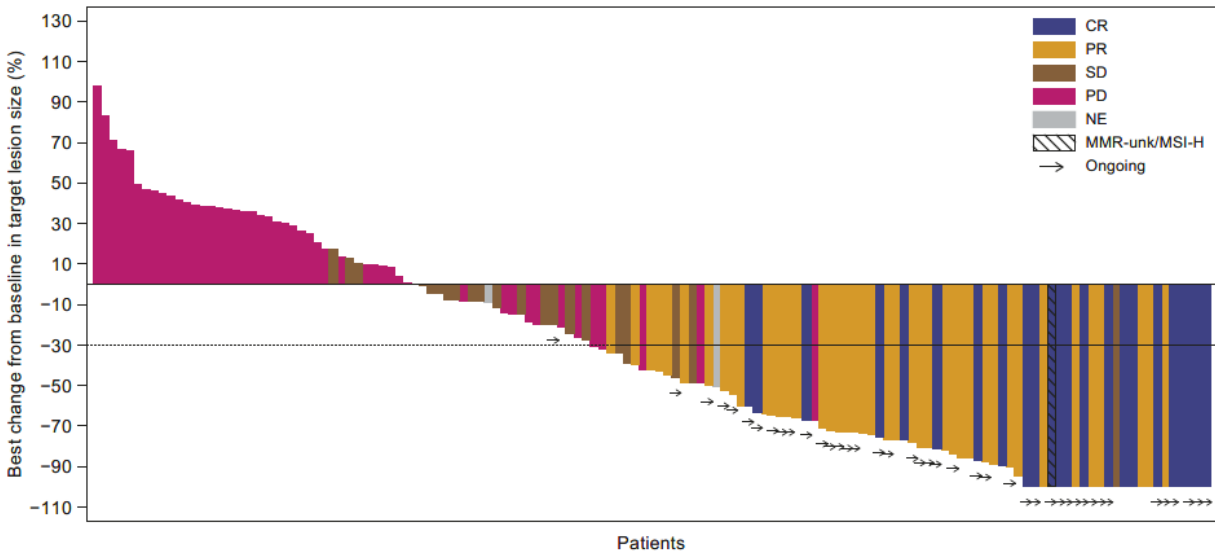

B.

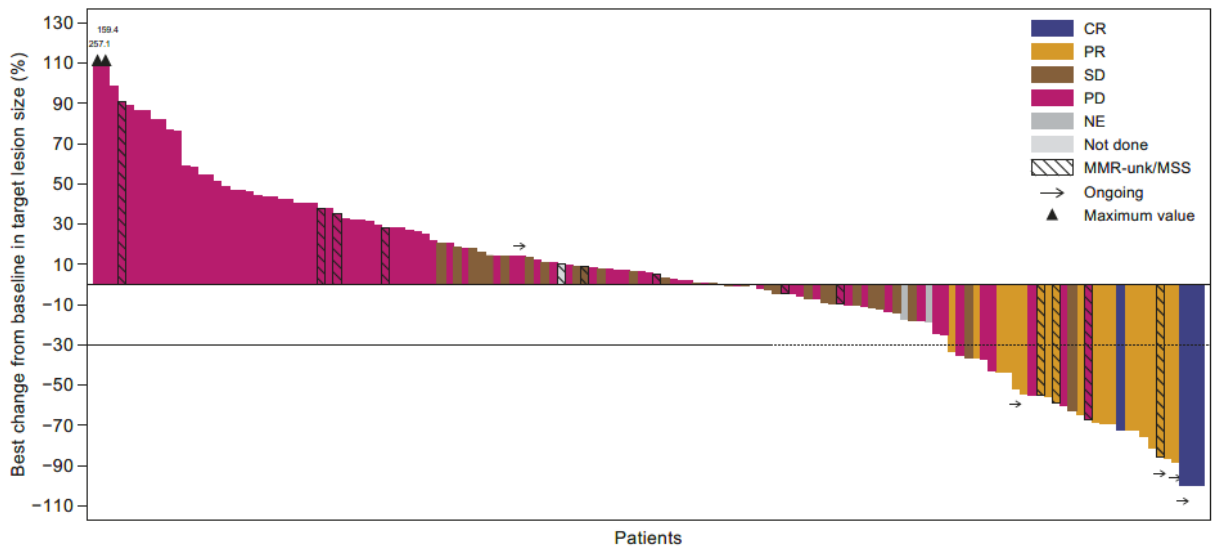

**Supplementary Figure S2.** Best percent change from baseline in target lesion size in patients with advanced or recurrent EC treated with dostarlimab monotherapy. **A**, patients with dMMR/MSI-H EC (Cohort A1). **B**, patients with MMRp/MSS EC (Cohort

A2). CR, complete response; dMMR, mismatch repair deficient; EC, endometrial cancer; MMRunk, mismatch repair unknown; MSI-H, microsatellite instability–high; MSS, microsatellite stable; NE, not evaluable; PD, progressive disease; PR, partial response; SD, stable disease.



**Supplementary Figure S3. Progression-free survival by cohort.**

A.

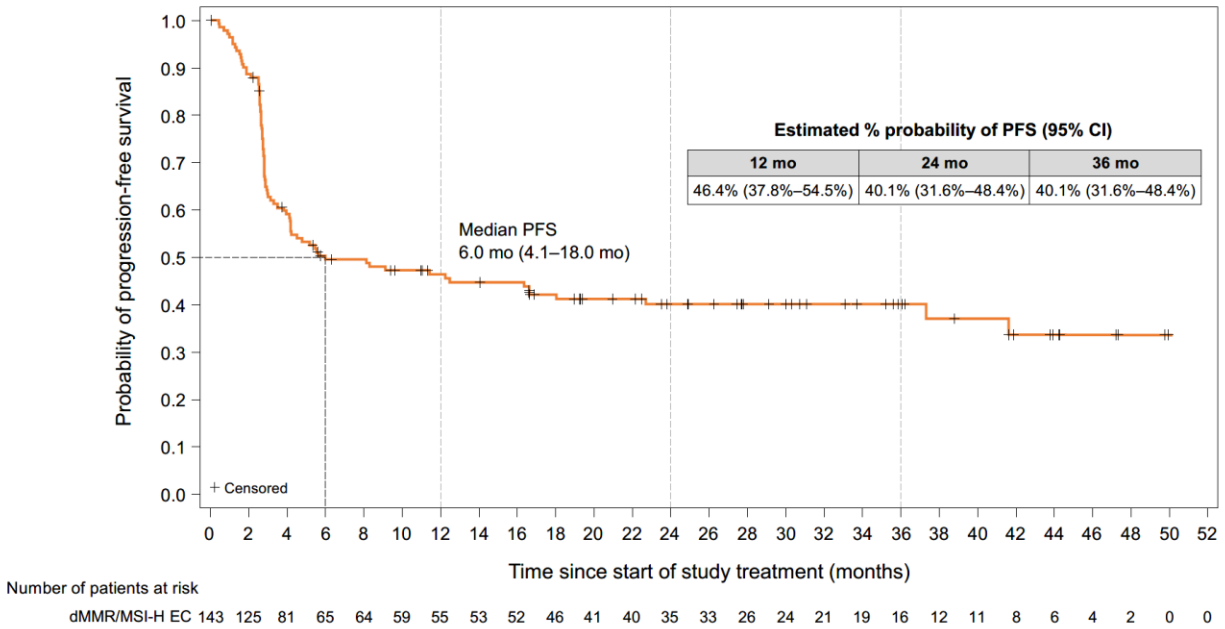

B.

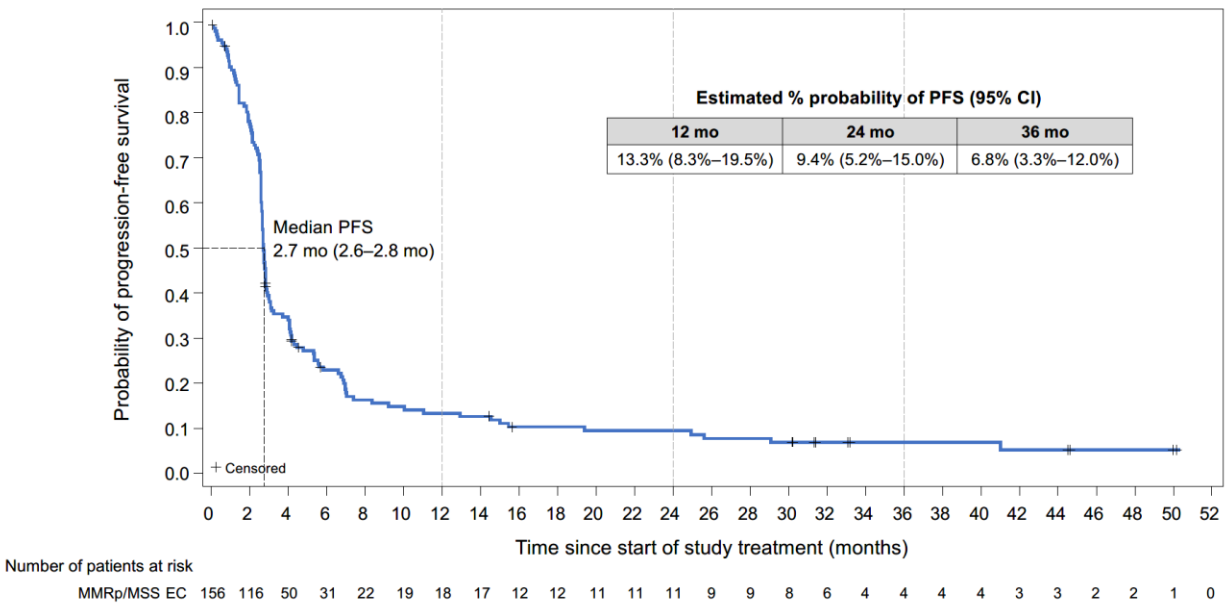

**Supplementary Figure S3. Progression-free survival (PFS) in patients with advanced or recurrent EC treated with dostarlimab monotherapy. A, patients with dMMR/MSI-H**

EC (Cohort A1). **B**, patients with MMRp/MSS EC (Cohort A2). dMMR, mismatch repair deficient; MMRp, mismatch repair proficient; MMRunk, mismatch repair unknown; MSI-H, microsatellite instability–high; MSS, microsatellite stable.

**Supplementary Figure S4. Overall survival by cohort.**

A.

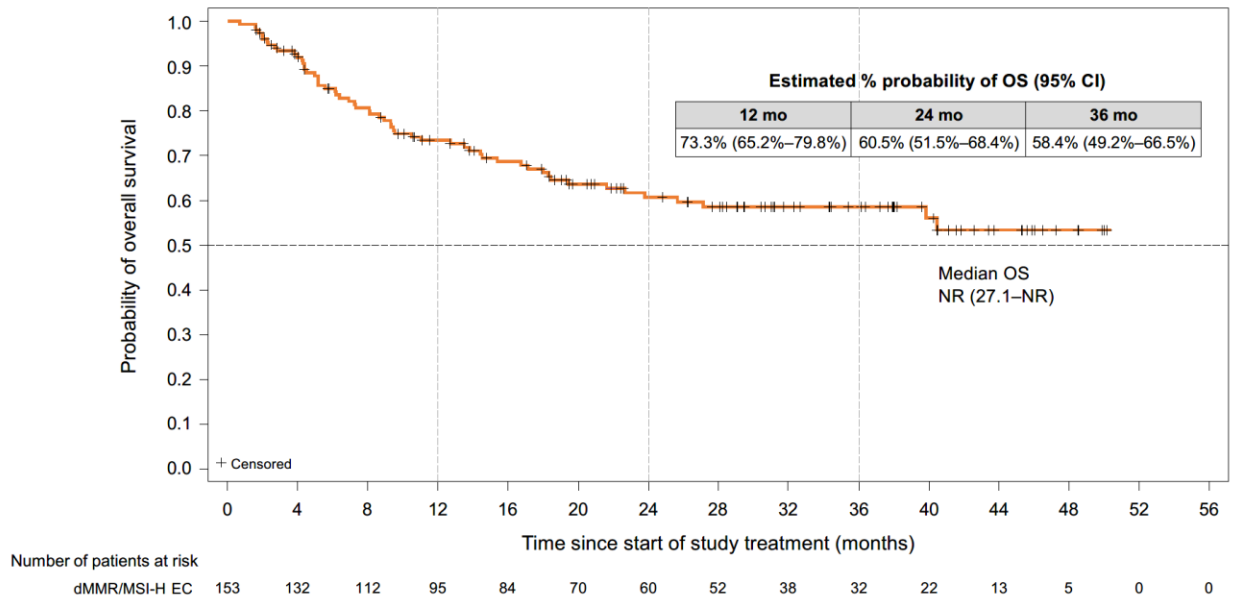

B.

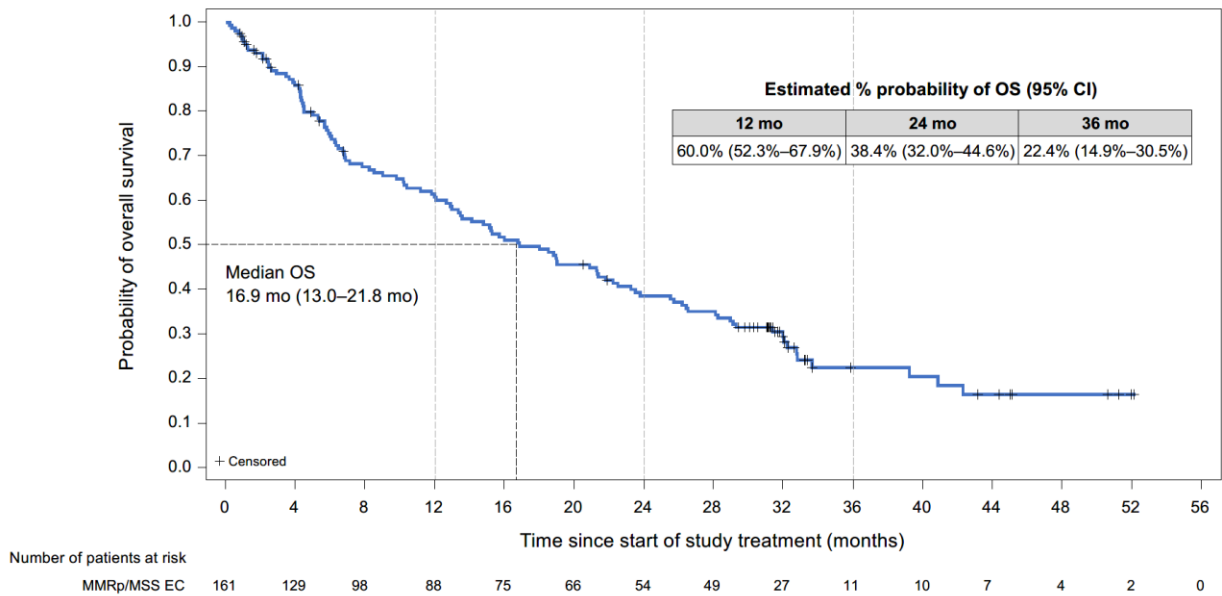

**Supplementary Figure S4. Overall survival (OS) in patients with advanced and recurrent EC treated with dostarlimab monotherapy. A,** patients with dMMR/MSI-H EC (Cohort A1). **B,** patients with MMRp/MSS EC (Cohort A2). dMMR, mismatch repair

deficient; EC, endometrial cancer; MMRp, mismatch repair proficient; MMRunk, mismatch repair unknown; MSI-H, microsatellite instability–high; MSS, microsatellite stable.

**Supplementary Figure S5. Objective response rate by tumor histology.**

A.

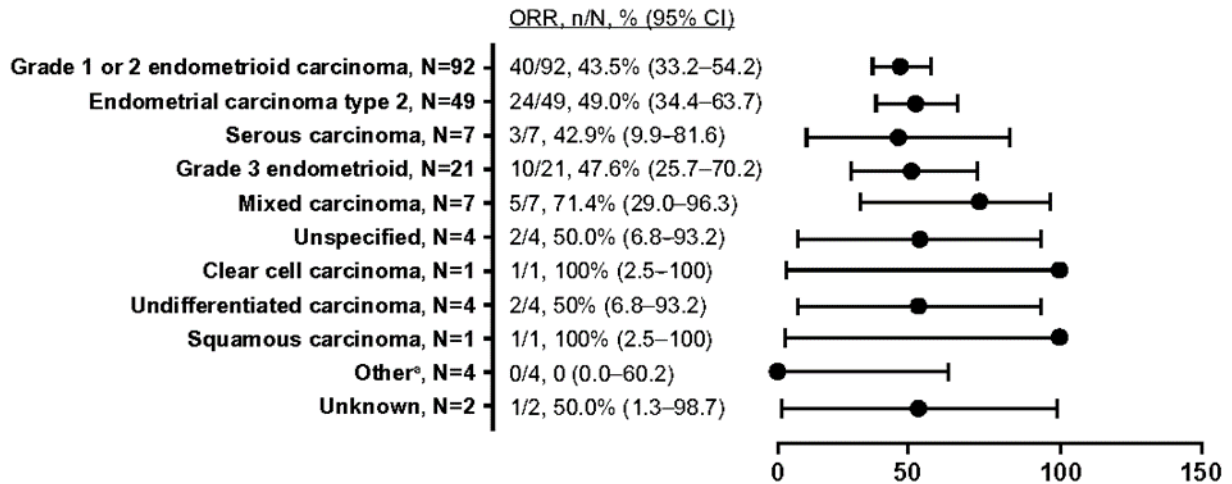

B.

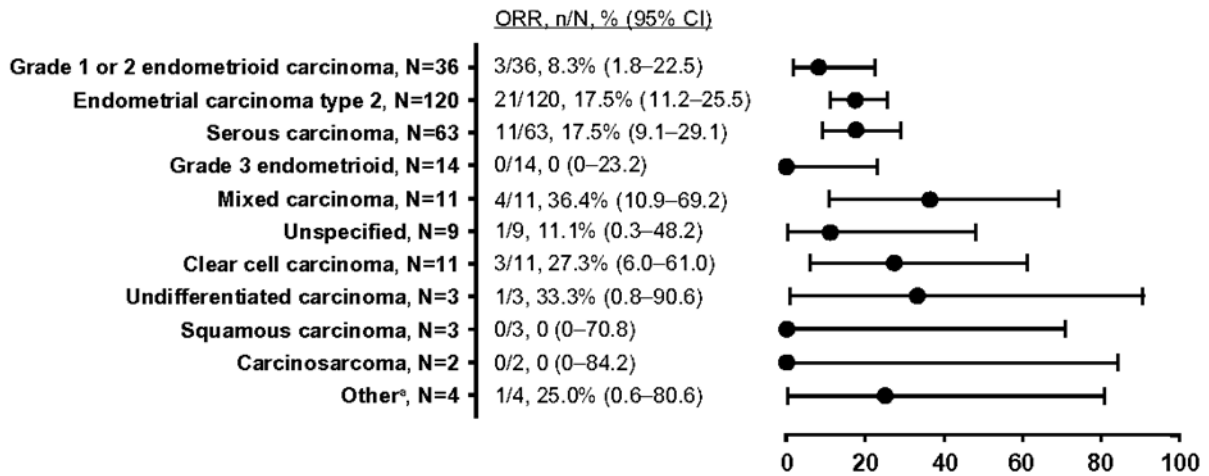

<sup>a</sup>Other includes dedifferentiated, endometrial adenocarcinoma, endometrial adenocarcinoma NOS, endometrial neuroendocrine carcinoma, high-grade uterine carcinoma, and undifferentiated clear cell carcinoma

**Supplementary Figure S5.** Objective response rate (complete or partial response) in patients with advanced and recurrent EC treated with dostarlimab monotherapy stratified by tumor histology. **A**, patients with dMMR/MSI-H EC (Cohort A1). **B**, patients with MMRp/MSS EC (Cohort A2). dMMR, mismatch repair deficient; EC, endometrial

cancer; MMRp, mismatch repair proficient MSI-H; microsatellite instability–high; MSS, microsatellite stable

## Supplementary Figure S6. DOR and PFS by molecular subtype.

A.

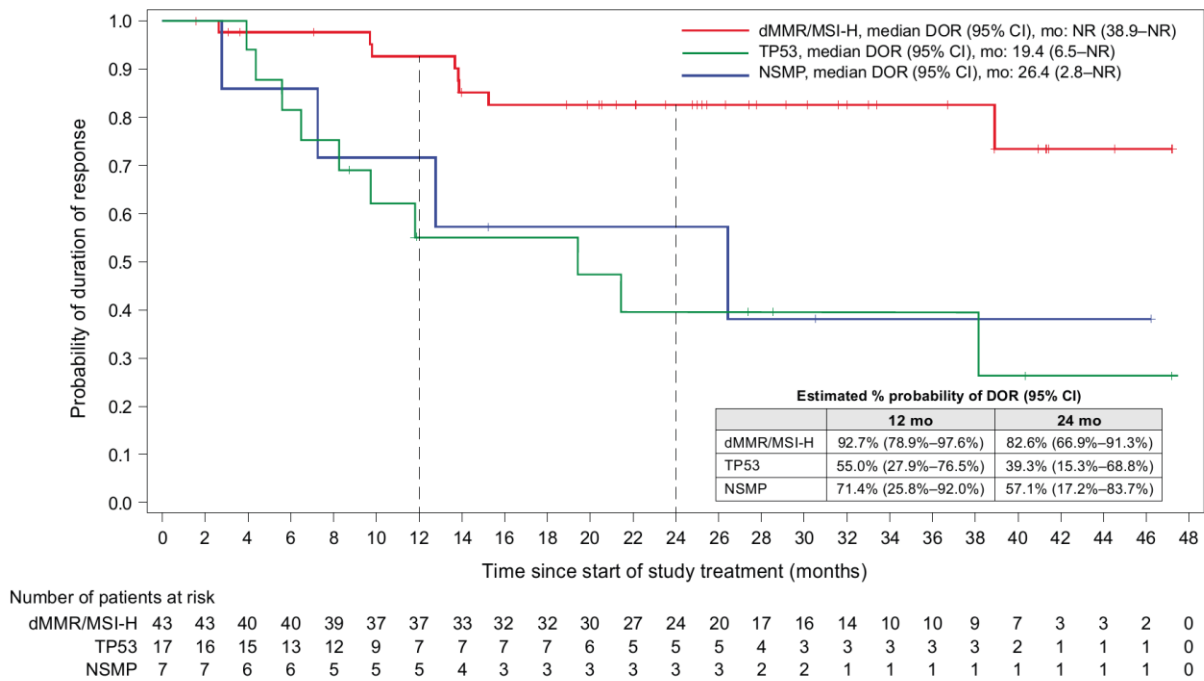

B.

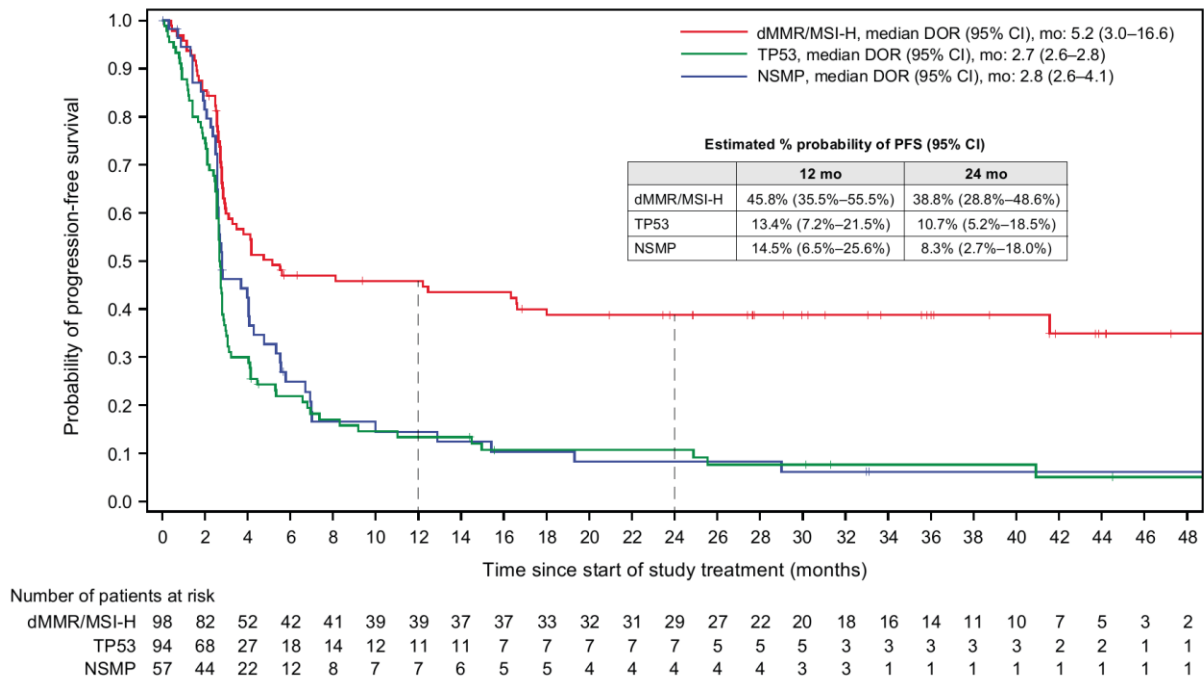

**Supplementary Figure S6. Response by molecular subtype in patients with dMMR/MSI-H EC (Cohort A1) and patients with MMRp/MSS EC (Cohort A2) treated with dostarlimab monotherapy. A, Duration of response (DOR). B, Progression-free**

survival (PFS). dMMR, mismatch repair deficient; EC, endometrial cancer; MMRp, mismatch repair proficient; MMRunk, mismatch repair unknown; MSI-H, microsatellite instability–high; MSS, microsatellite stable; NSMP, no specific molecular profile; *TP53*mut, *TP53* mutation subtype.
